# Supplementary material for: Assembly of the cochlear gap junction macromolecular complex requires connexin 26
Source: JCI journal article supplement (doi:10.1172/jci67621), 2014-03-03
Supplement: sd1 [file 1]

301 Moved Permanently

# Moved Permanently

The document has moved here.
